RESEARCH ARTICLE

# Age-Based Differences in the Genetic Determinants of Glycemic Control: A Case of *FOXO3* Variations

Liang Sun<sup>1</sup>, Caiyou Hu<sup>2</sup>, Yu Qian<sup>3</sup>, Chenguang Zheng<sup>4</sup>, Qinghua Liang<sup>2</sup>, Zeping Lv<sup>2</sup>, Zezhi Huang<sup>5</sup>, Keyan Qi<sup>6</sup>, Jin Huang<sup>7</sup>, Qin Zhou<sup>2</sup>, Ze Yang<sup>1\*</sup>

**1** The key Laboratory of Geriatrics, Beijing Hospital and Beijing Institute of Geriatrics, Ministry of Health, Beijing, China, **2** Department of Neurology, Jiangbin Hospital, Nanning, Guangxi, China, **3** Key Laboratory of Biorheological Science and Technology, Ministry of Education, Bioengineering College, Chongqing University, Chongqing, China, **4** Department of Cardiothoracic Surgery, Guangxi Maternal and Child Health Hospital, Nanning, Guangxi, China, **5** Office of longevity cultural, People's government of Yongfu County, Yongfu, Guangxi, China, **6** Lab of Genetics and Metabolism, Beijing Obstetrics and Gynecology Hospital, Beijing, China, **7** Department of obstetrics, Beijing Shunyi Airport Hospital, Beijing, China

\* [yang\\_ze@sina.com](mailto:yang_ze@sina.com)

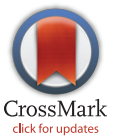

OPEN ACCESS

**Citation:** Sun L, Hu C, Qian Y, Zheng C, Liang Q, Lv Z, et al. (2015) Age-Based Differences in the Genetic Determinants of Glycemic Control: A Case of *FOXO3* Variations. PLoS ONE 10(5): e0126696. doi:10.1371/journal.pone.0126696

**Academic Editor:** Victor Sanchez-Margalet, Virgen Macarena University Hospital, School of Medicine, University of Seville, SPAIN

**Received:** October 10, 2014

**Accepted:** April 6, 2015

**Published:** May 20, 2015

**Copyright:** © 2015 Sun et al. This is an open access article distributed under the terms of the [Creative Commons Attribution License](https://creativecommons.org/licenses/by/4.0/), which permits unrestricted use, distribution, and reproduction in any medium, provided the original author and source are credited.

**Data Availability Statement:** All available data are within the paper and its Supporting Information files. Ethical considerations prevent public sharing of individual data. Requests may be sent to Email: [sunbmu@foxmail.com](mailto:sunbmu@foxmail.com).

**Funding:** This study was supported by the Beijing Nova program (Z121107002512058), Natural Science Foundation of China (81061120527, 81370445, 81472408), funding from National Department Public Benefit Research Foundation by Ministry of Health P. R. China (201302008) and 12th

## Abstract

### Background

Glucose homeostasis is a trait of healthy ageing and is crucial to the elderly, but less consideration has been given to the age composition in most studies involving genetics and hyperglycemia.

### Methods

Seven variants in *FOXO3* were genotyped in three cohorts (n = 2037; LLI, MI\_S and MI\_N; mean age: 92.5±3.6, 45.9±8.2 and 46.8±10.3, respectively) to compare the contribution of *FOXO3* to fasting hyperglycemia (FH) between long-lived individuals (LLI, aged over 90 years) and middle-aged subjects (aged from 35–65 years).

### Results

A different genetic predisposition of *FOXO3* alleles to FH was observed between LLI and both of two middle-aged cohorts. In the LLI cohort, the longevity beneficial alleles of three variants with the haplotype “AGGC” in block 1 were significantly protective to FH, fasting glucose, hemoglobin A<sub>1c</sub> and HOMA-IR. Notably, combining multifactor dimensionality reduction and logistic regression, we identified a significant 3-factor interaction model (rs2802288, rs2802292 and moderate physical activity) associated with lower FH risk. However, not all of the findings were replicated in the two middle-aged cohorts.

### Conclusion

Our data provides a novel insight into the inconsistent genetic determinants between middle-aged and LLI subjects. *FOXO3* might act as a shared genetic predisposition to hyperglycemia and lifespan.

5 Year National Program from the Ministry of Scientific Technology (2012BAI10B01).

**Competing Interests:** The authors have declared that no competing interests exist.

## Introduction

Glucose homeostasis is a trait of healthy aging and is crucial to the elderly. Fasting hyperglycemia (FH) is the most convenient and practical predictor of overall glycemic control monitoring throughout the day [1]. Suboptimal control of fasting hyperglycemia could increase the risk of cardiovascular complications in elderly subjects [2, 3]. In the United States, fasting hyperglycemia causes excess morbidity and increased health-care costs and affects approximately one in five (18.7%) persons aged >65 years; further, as the population ages, the impact of hyperglycemia intensifies [4]. Indeed, fasting hyperglycemia is also considered an independent predictor of mortality [5].

Only a few of long-lived individuals (LLI) have been involved in most studies involving the genetics of ageing-related disorders. Epidemiological evidence suggests that different genetic risk factors are involved throughout the course of human life [6]. The American Diabetes Association (ADA) and the European Association for the Study of Diabetes (EASD) have suggested that the management of hyperglycemia must be individualized [7]. Therefore, it is necessary to re-characterize the risk factors of fasting hyperglycemia that are specific to elderly subjects.

Glucose homeostasis is directly caused by the dysfunction of the insulin/IGF-1 signaling (IIS) pathway [8]. Forkhead box class O3 (FOXO3), as the *daf-16* human homologue, is the main target of the IIS pathway [9]. FOXO3 has been recognized as a “master” gene in Europeans [10–12], East Asians [13] and Ashkenazi Jews [14], although its potential mechanism is unclear. It is worth noting that the *Cis*-element of the FOXO3 binding site has been identified in the promoters of the gluconeogenesis genes *G6Pase* and *PEPCK* [15], implicating it in fasting glucose control. However, no supportive evidence of FOXO3 variants has been reported to confer the risk for fasting hyperglycemia or type 2 diabetes (T2D) in middle-aged subjects of Indian origin [16]. Moreover, potential interactions between FOXO3 variants and other longevity-related factors, such as *APOE*\**e4* [17], physical activity (PA) [18] and lipid levels [19], have been even less well studied.

Here, we performed a comprehensive analysis of FOXO3 and fasting hyperglycemia in three cohorts (n = 2037). The tagging single nucleotide polymorphism (tSNP) approach was used to compare the contribution of FOXO3 to risk of fasting hyperglycemia between LLI and middle-aged (MI\_S and MI\_N) subjects. The interactions between FOXO3 variants and other longevity-related factors were further addressed.

## Materials and Methods

### Study population

The project is a cross-sectional study within the framework of the “Longevity and Health of Aging Population in Guangxi China (LHAPGC)” and “Beijing Type 2 Diabetes Studies (BTDS)” [20, 21]. A total of 2,037 Han Chinese are included, consisting of three panels: 506 LLI (centenarians and nonagenarians) (mean age: 92.5±3.6 years) and 1,531 middle-aged subjects (830 southern Chinese, MI\_S, mean age: 45.9±8.2 years; 701 northern Chinese, MI\_N, mean age: 46.8±10.3 years). According to the 1999 World Health Organization (WHO) diagnostic criteria [22], the subjects were defined as FH (Impaired Fasting Glycaemia/ T2D) or normal controls (fasting plasma glucose <= 6.0 mmol/l). Subjects being treated with oral hypoglycemic agents (OHA) were excluded. The Ethics Committee of Beijing Hospital,

Ministry of Health approved the study protocol. All participants were informed and provided informed consent in writing.

## Data collection and laboratory measurements

The peripheral blood was collected for DNA extraction and laboratory biochemistry testing according to previously described methods [23]. Genomic DNA was isolated using a standardized salting-out procedure. Clinical biomarkers including fasting glucose (FPG), hemoglobin A<sub>1C</sub> (HBA<sub>1C</sub>), insulin (FINS), total cholesterol (TC), triglyceride (TG), HDL-cholesterol, LDL-cholesterol and *APOE*\*e4 status [24] were assessed. The insulin resistance status was assessed through a homeostasis model assessment of insulin resistance (HOMA-IR), calculated as FPG (mM)×FINS (mIU/L) /22.5 [25].

Trained and qualified personnel conducted the households and home visits. Potential confounding factors included gender, current drinking (yes, no), current smoking (yes, no), physical activity (PA) (no exercise, light, moderate, heavy), education and family history of chronic diseases (coronary heart disease, stroke, hypertension or diabetes) were assessed using a self-report questionnaire.

## SNP selection and genotyping

Based on the CHB population (Han Chinese residents in Beijing) data, we selected seven tSNP covering 120.9 kb on chromosome 6 by HapMap online tools according to: (1) minor allele frequency (MAF) >0.05; (2) an  $r^2$  threshold of 0.8 and a log of odds (LOD) threshold for multi-marker testing of 3.0; (3) a minimum distance between tags of 100 bp; (4) SNPs for which an association with longevity has been reported; and (5) both pairwise tagging and aggressive multi-marker tagging (use 2-marker haplotypes) strategies were conducted to increase the efficiency of tagging.

The tSNPs were genotyped by a small amplicon-based high resolution melting (HRM) assay with LightScanner (Idaho Technology, Alameda, CA, USA) (S1 Table) [26]. To ensure the reliability of the results, duplicate samples and sequencing verified genotyped samples were included as quality controls.

## Statistical analysis

SPSS software (version 20.0) was used for analysis. Both of clinical fasting hyperglycemia diagnosis and tertiles of levels of FPG, HbA<sub>1c</sub> and HOMA-IR were used for the comparisons. One-way ANOVA was used to compare continuous parameters among three groups followed by Tukey's post-hoc tests. Logistic regression was performed to compare minor allele frequency (MAF) after adjusting for confounding factors (e.g., gender, drinking, smoking, PA). An allele contrast model was used, unless specified. Haploview (version 4.2) was used to estimate the Hardy-Weinberg equilibrium, linkage disequilibrium (LD) and common haplotype (>3%) among genotyped variants. A two-tailed  $P < 0.05$  was considered statistically significant. Power calculations were performed with an interactive program, Power and Sample size Calculation (version 3.0) [27]. To assess interactions between *FOXO3* genotype and other longevity-related factors (physical activity/ *APOE4*/ lipid levels), respective multiplicative interaction terms were included in regression models. An additive model was used to code SNPs for the 'risk' allele, the allele that increased the probability of being a case. Accordingly, '0' indicated the subject was homozygous for the non-risk allele; the heterozygote was coded '1', and those who were homozygous for the risk allele were coded '2'. Multifactor Dimensionality Reduction (MDR, version 1.2.2) was also used to confirm the interaction (epistasis) between genetic and other longevity-related factors (permutation  $n = 8000$ ) to determine the statistical significance of the

**Table 1. Demographic and metabolic characteristics of the study samples.**

|                                           | LLI        | MI_S       | MI_N       | <i>P</i> <sub>post-hoc1</sub> <sup>a</sup> | <i>P</i> <sub>post-hoc2</sub> <sup>b</sup> |
|-------------------------------------------|------------|------------|------------|--------------------------------------------|--------------------------------------------|
| AGE (years)                               | 92.5±3.6   | 45.9±8.2   | 46.8±10.3  | <0.001                                     | <0.001                                     |
| Samples (n)                               | 506        | 830        | 701        | NA                                         | NA                                         |
| Gender (male %) <sup>d</sup>              | 26.5       | 66.3       | 55.9       | <0.001                                     | <0.001                                     |
| FH (%) <sup>d</sup>                       | 42.0       | 48.1       | 44.7       | 0.028                                      | 0.341                                      |
| FPG (mmol/L)                              | 5.7±1.4    | 6.3±1.4    | 5.9±0.9    | 0.021                                      | 0.049                                      |
| HbA <sub>1c</sub> (%)                     | 5.9±1.8    | 6.1±2.2    | 6.0±2.6    | 0.033                                      | 0.027                                      |
| HOMA-IR <sup>c</sup>                      | 2.2±0.4    | 2.6±1.1    | 2.4±0.7    | 0.014                                      | 0.018                                      |
| BMI (kg/m <sup>2</sup> )                  | 18.6±3.7   | 23.6±3.2   | 23.5±4.5   | <0.001                                     | <0.001                                     |
| SBP (mmHg)                                | 149.1±23.0 | 124.1±16.2 | 118.1±16.1 | <0.001                                     | <0.001                                     |
| DBP (mmHg)                                | 79.9±12.2  | 76.1±10.6  | 74.2±10.6  | 0.017                                      | <0.001                                     |
| TC (mmol/L)                               | 4.8±1.1    | 5.1±0.9    | 4.9±0.3    | 0.029                                      | 0.048                                      |
| TG (mmol/L)                               | 1.3±0.9    | 2.6±1.3    | 2.4±1.1    | <0.001                                     | <0.001                                     |
| HDL-cholesterol (mmol/L)                  | 1.3±0.3    | 1.2±0.2    | 1.2±0.2    | 0.347                                      | 0.281                                      |
| LDL-cholesterol (mmol/L)                  | 2.9±0.9    | 2.7±0.8    | 2.4±0.5    | 0.033                                      | 0.026                                      |
| APOE* <i>e4</i> carriers (%) <sup>d</sup> | 14.6       | 18.9       | 21.3       | 0.044                                      | 0.003                                      |

Data are shown as the mean±SD or n; FH: fasting hyperglycemia; LLI: long-lived individuals; MI\_S: middle-aged controls (southern); MI\_N: middle-aged (northern); HbA<sub>1c</sub>: hemoglobin A<sub>1c</sub>; HOMA-IR: homeostasis model assessment of insulin resistance; BMI: body mass index; SBP: systolic blood pressure; DBP: diastolic blood pressure; TC: total cholesterol; TG: triglyceride; HDL: high density lipoprotein; LDL: low density lipoprotein; NA: not available.

<sup>a</sup> *p* values of post-hoc pair-wise comparisons of the parameters between LLI and MI\_S.

<sup>b</sup> *p* values of post-hoc pair-wise comparisons of the parameters between LLI and MI\_N.

<sup>c</sup> after log-transformed to normalize skewed distribution.

<sup>d</sup> comparison of categorical variable based on Chi-square test.

doi:10.1371/journal.pone.0126696.t001

best models. The testing balanced accuracy (TBA) and cross-validation consistency (CVC) were estimated. These data were also analyzed using an extension of the MDR algorithm that includes adjustment for covariates, the Generalized Multifactor Dimensionality Reduction (GMDR, V0.7) software package.

## Results

### Participant Characteristics for the Cohorts

Characteristics of three panels of involved participants (506 LLI, 830 MI\_S and 701 MI\_N) are presented in [Table 1](#). Generally, the prevalence of fasting hyperglycemia is higher in middle-aged subjects than it is in long-lived individuals. In addition, subjects in the long-lived individuals cohort have lower levels of FPG, HbA<sub>1c</sub>, HOMA-IR, BMI, TC, TG, and proportion of APOE\**e4* than middle-aged subjects, except for higher blood pressure and LDL-cholesterol.

### FOXO3 Genotype and Haplotype Analysis

Given subject number in each group and an average allelic relative risk of 0.67, we had 82.2%, 96.3% and 92.9% power to detect a difference of a significance level of 5% corresponding to LLI, MI\_S and MI\_N (assumed MAF = 0.35).

According to the extent of LD in FOXO3 using the HapMap CHB data, seven tSNPs were selected and genotyped that could define most of the variants ([S2 Table](#)). All tSNPs were in Hardy-Weinberg equilibrium in non-FH controls of all three cohorts ([Table 2](#)). Two haplotype blocks were defined and separated by rs7341233 ([Fig 1](#)). The block 1 consisted of the first four

**Table 2. Minor allele frequencies of the FOXO3 tSNPs in three cohorts.**

| Variants in FOXO3 <sup>a</sup> | Position <sup>b</sup> | LLI (n = 506) |                | MI_S (n = 830) |                | MI_N (n = 701) |                |
|--------------------------------|-----------------------|---------------|----------------|----------------|----------------|----------------|----------------|
|                                |                       | MAF           | P <sup>c</sup> | MAF            | P <sup>c</sup> | MAF            | P <sup>c</sup> |
| rs2802288 (G/A)                | 109002908             | 0.33/0.41     | 0.014          | 0.31/0.33      | 0.310          | 0.29/0.32      | 0.170          |
| rs2802290 (A/G)                | 109012373             | 0.30/0.36     | 0.040          | 0.31/0.34      | 0.151          | 0.29/0.33      | 0.097          |
| rs2802292 (T/G)                | 109015211             | 0.31/0.38     | 0.019          | 0.29/0.33      | 0.077          | 0.30/0.32      | 0.267          |
| rs2764264 (T/C)                | 109041154             | 0.33/0.39     | 0.053          | 0.30/0.33      | 0.173          | 0.29/0.31      | 0.293          |
| rs7341233 (T/C)                | 109046973             | 0.17/0.18     | 0.717          | 0.18/0.19      | 0.646          | 0.18/0.19      | 0.657          |
| rs13217795 (T/C)               | 109080791             | 0.30/0.35     | 0.111          | 0.27/0.30      | 0.335          | 0.25/0.27      | 0.336          |
| rs3800231 (G/A)                | 109104959             | 0.33/0.36     | 0.281          | 0.29/0.31      | 0.244          | 0.28/0.30      | 0.450          |

MAF: minor allele frequency; FH: fasting hyperglycemia; LLI: long-lived individuals; MI\_S: middle-aged controls (southern); MI\_N: middle-aged (northern).

<sup>a</sup> the minor allele corresponds to the latter base in each description of variants, separated by a “/”.

<sup>b</sup> Position on Chromosome 6 (GRCh36/hg18).

<sup>c</sup> Comparisons under allele-contrast model between FH cases and controls.

doi:10.1371/journal.pone.0126696.t002

variants, which defined three common haplotypes and described 99.2% of haplotype diversity. In both middle-aged panels (MI\_S and MI\_N), all of the MAFs were similar between FH and non-FH subjects. However, three variants (rs2802288\* A, rs2802290\* G and rs2802292\* G) and haplotype 2 “AGGC” in Block 1 (compared with all other haplotypes combined) were associated with decreased risk of fasting hyperglycemia only in long-lived individuals (Tables 2 and 3). Consistently, the FH- protective alleles/ haplotype were also benefit for longevity in general, except for rs2802290 (T/G) (S3 Table).

### FOXO3 Variants and Hyperglycemia related Clinical Parameters Analysis

As expected, only in long-lived individuals, subjects in the top tertile of both FPG and HbA<sub>1c</sub> experienced lower MAFs of rs2802288 and rs2802292 than did patients of the other two tertiles ( $p < 0.05$ ). Marginal differences were found with respect to rs2802292\* G across the tertiles of HOMA-IR. Carriers with haplotype 2 “AGGC” had a trend for lower FPG levels as well (Fig 2). However, except for a slight difference between rs2802292\* G and HbA<sub>1c</sub> in both middle-aged cohorts, no other relationship was observed among the lipid profiles, the risk for T2DM, obesity and other cardiovascular diseases in all three cohorts for any FOXO3 variant and haplotype (S4 Table).

### Gene-Gene and Gene-Environment Interactions

The interaction between FOXO3, APOE\* e4, and environmental factors (gender, drinking, smoking, PA, education, and family history of chronic diseases) was further analyzed. Only rs2802288\* A and rs2802292\* G in block 1 were included because of the strong LD pattern. The 3-factor model comprised of rs2802288\* A, rs2802292\* G and moderate PA emerged as the best fasting hyperglycemia predicting model with the highest level of statistical significance (MDR: TBA = 0.571, CVC = 9/10,  $p = 0.007$ ; GMDR adjusted for age, BMI and alcohol drinking: TBA = 0.542, CVC = 9/10,  $p = 0.009$ ). The nonparametric MDR analysis indicated that the 3-factor model was the best model but did not indicate whether there was a synergistic relationship. Therefore, we applied a parametric logistic regression analysis and observed an interaction (among rs2802288\* A, rs2802292\* G and moderate PA) that was inversely associated with risk of fasting hyperglycemia ( $p = 0.003$ , OR = 0.589, 95%CI = 0.418–0.831) only in long-lived

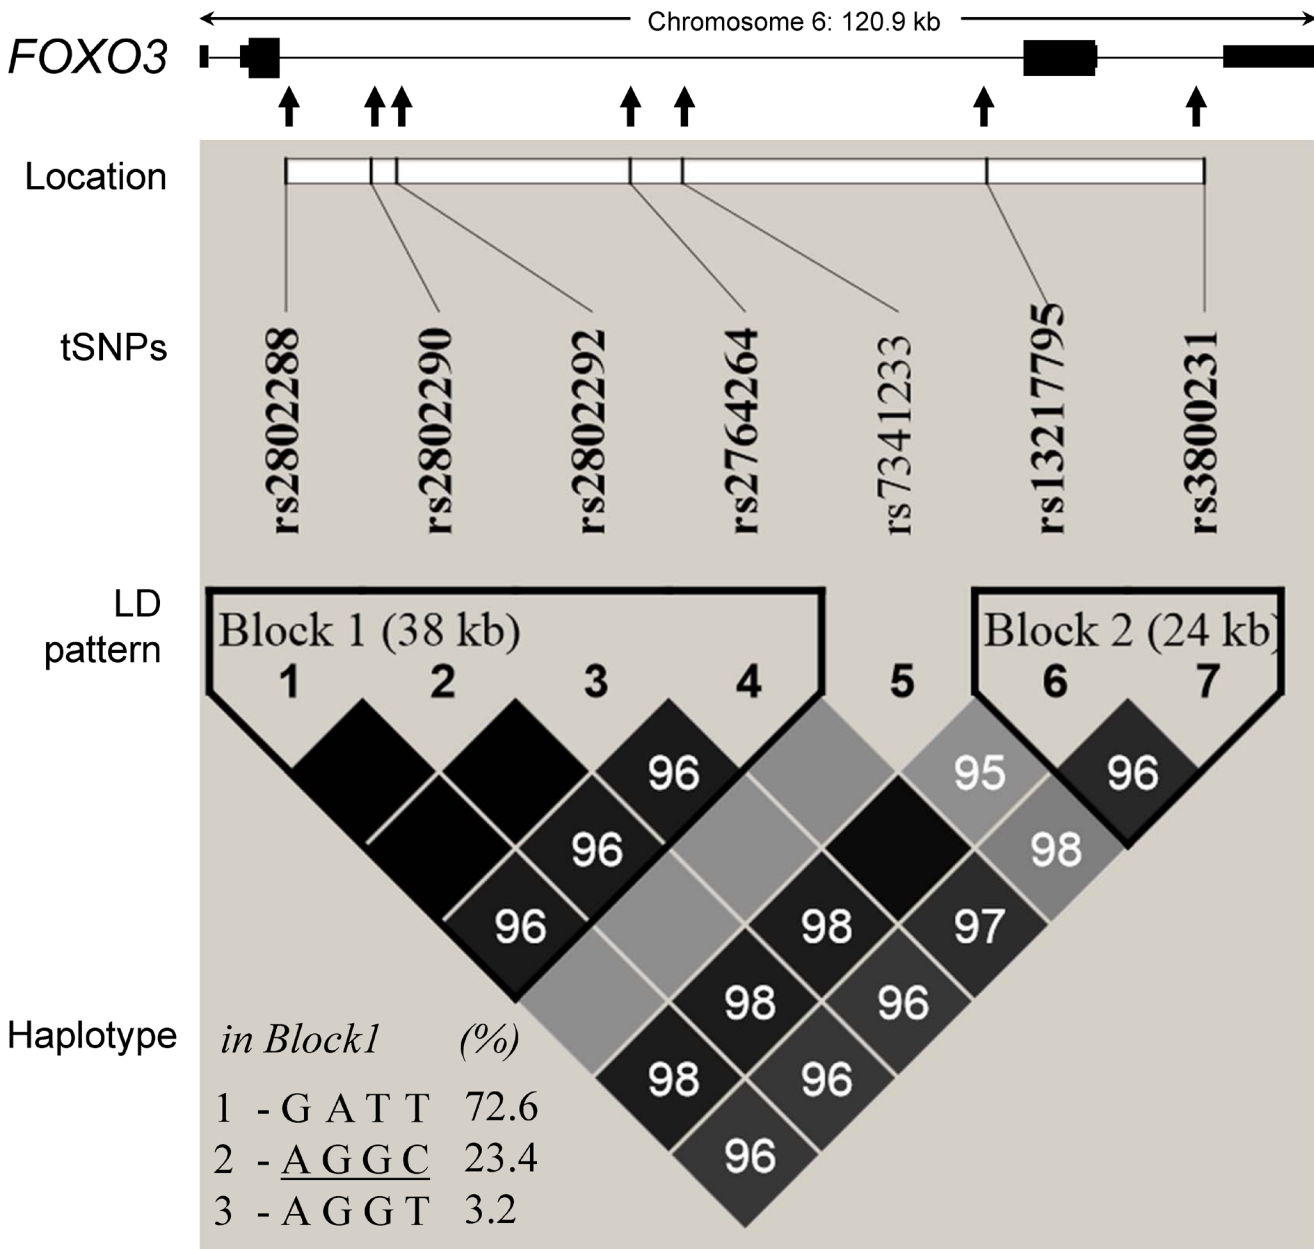

**Fig 1. Graphical representation of the polymorphisms and LD structure across FOXO3 in the subjects of this study.** The FOXO3 locus consists of four exons (thin dark-shaded boxes represent UTRs, and thick dark-shaded boxes represent coding exons). The thin lines represent introns. The relative locations of seven variants are listed. Two linkage disequilibrium (LD) blocks are defined. The measures of LD ( $D'$ ) among paired of variants are shown graphically by color ( $r^2$ ). A white box represents very low LD, and a dark box represents very high LD. The constitutions and frequencies of three common haplotypes in block 1 are listed.

doi:10.1371/journal.pone.0126696.g001

individuals. The analysis of MDR and logistic regression both suggested the FOXO3-PA interaction might have a bigger effect than if considered independently. However, no correlation was observed in either middle-aged panel.

**Table 3. Comparisons of effects on risk of FH between LLI and middle-aged subjects.**

| Comparison                   | LLI (n = 506)    |       | MI_S (n = 830)   |       | MI_N (n = 701)   |       |
|------------------------------|------------------|-------|------------------|-------|------------------|-------|
|                              | OR (95%CI)       | P     | OR (95%CI)       | P     | OR (95%CI)       | P     |
| rs2802288 (G/A)              |                  |       |                  |       |                  |       |
| Model <sub>cca</sub>         | 0.72 (0.56–0.94) | 0.014 | 0.90 (0.73–1.10) | 0.310 | 0.85 (0.68–1.07) | 0.170 |
| Model <sub>adj</sub>         | 0.77 (0.50–0.99) | 0.019 | 0.94 (0.77–1.16) | 0.420 | 0.91 (0.72–1.14) | 0.372 |
| rs2802290 (A/G)              |                  |       |                  |       |                  |       |
| Model <sub>cca</sub>         | 0.76 (0.58–0.99) | 0.040 | 0.86 (0.70–1.06) | 0.151 | 0.83 (0.66–1.04) | 0.097 |
| Model <sub>adj</sub>         | 0.81 (0.62–1.05) | 0.128 | 0.90 (0.74–1.11) | 0.214 | 0.94 (0.75–1.17) | 0.301 |
| rs2802292 (T/G)              |                  |       |                  |       |                  |       |
| Model <sub>cca</sub>         | 0.73 (0.56–0.95) | 0.019 | 0.83(0.67–1.02)  | 0.077 | 0.88 (0.70–1.10) | 0.267 |
| Model <sub>adj</sub>         | 0.67 (0.51–0.87) | 0.012 | 0.92 (0.75–1.13) | 0.171 | 1.04 (0.83–1.30) | 0.349 |
| Haplotype2:AGGC <sup>a</sup> |                  |       |                  |       |                  |       |
| Model <sub>perm</sub>        | 0.67 (0.51–0.87) | 0.019 | 1.09 (0.83–1.42) | 0.441 | 1.26(0.96–1.65)  | 0.496 |
| Model <sub>adj</sub>         | 0.74 (0.57–0.95) | 0.043 | 1.12 (0.85–1.47) | 0.462 | 0.97 (0.74–1.28) | 0.253 |

LLI: long-lived individuals; MI\_S: middle-aged controls (southern); MI\_N: middle-aged (northern); FH: fasting hyperglycemia; Model<sub>cca</sub>, Model<sub>adj</sub> and Model<sub>perm</sub> corresponded to allele contrast, adjusted for confounding factors (BMI, age, gender, drinking, current smoking and APOE\*ε4 status) and permutation corrections for multiple comparisons (n = 8000).

<sup>a</sup> between Haplotype2 and all other haplotypes combine.

doi:10.1371/journal.pone.0126696.t003

## Discussion

Although age is important in the pathogenesis of hyperglycemia, most previous studies have included only low numbers of long-lived individuals. In the present study, for the first time, we report the different genetic impact of FOXO3 on fasting hyperglycemia as an intermediated trait of healthy aging in long-lived individuals compared with middle-aged subjects (MI\_S, MI\_N).

In long-lived individuals, both single allele and haplotype analysis suggested a genetic association between FOXO3 block 1 and fasting hyperglycemia. Moreover, a 3-factor interaction between rs2802288\*A and rs2802292\*G in FOXO3 and moderate PA was identified by non-parametric MDR and logistic regression. The variants were also associated with improved glycaemic traits with lower FPG and HbA<sub>1c</sub> levels (rs2802288\*A, rs2802292\*G, and haplotype2 “AGGC”) and HOMA-IR (rs2802292\*G) in long-lived individuals. In contrast, all the findings did not exist in both middle-aged panels (MI\_S, MI\_N).

In a small Danish twin cohort, the rs2802292\*G was found to enhance insulin sensitivity with increased skeletal muscle-FOXO3 expression, although it has failed to be replicated in a middle-aged Inter99 cohort (aged 46±8) [28]. In this study, we also observed that rs2802292\*G was associated with decreased risk of fasting hyperglycemia, lower levels of hyperglycemia (FPG and HbA<sub>1c</sub>), and improved HOMA-IR only in long-lived individuals. In a middle-aged South Indian Dravidian population, Nair A K *et al.* failed to find contribution of FOXO3 to T2DM; the carriers with rs2802288\*A also seemed to have lower FPG and BMI, indicating improved insulin resistance [16]. Meanwhile, rs2802288 was in complete LD with rs2802292. Considering the strong LD in Block 1 and clues of individual variants in this study, we suspected that rs2802292\*G might act as the major contributor to fasting hyperglycemia.

We found an interaction between FOXO3 variants and moderate physical activity on fasting hyperglycemia in long-lived individuals. Since moderate physical activity could improve the insulin resistance and further uptake of glucose in skeletal muscles, it is reasonable for subjects

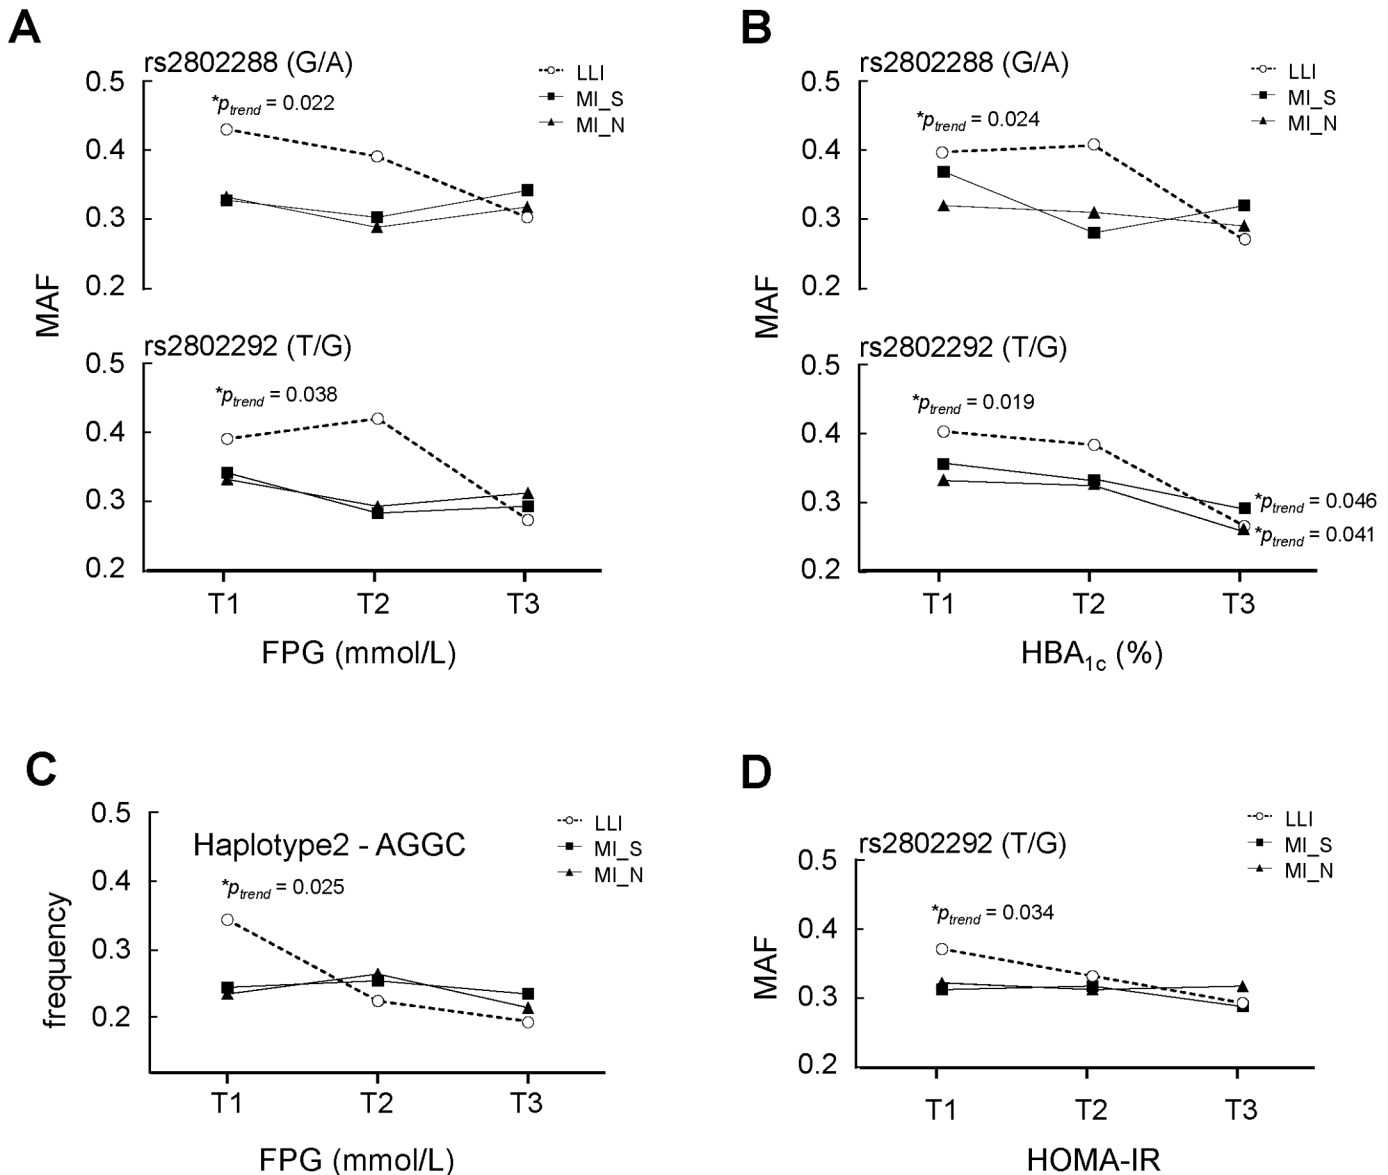

**Fig 2. Comparisons of alleles and haplotypes in FOXO3 and tertiles of hyperglycemia related parameters in each cohort.** MAF: minor allele frequency; T1, T2 and T3 represents the lowest, middle and highest tertile, respectively. *p*-values were obtained from logistic regression analysis adjusted for age and gender. Only in LLI, was a significant contribution of FOXO3 found. Both frequencies of rs2802288\*A and rs2802292\*G were reduced when A) fasting plasma glucose and B) HbA<sub>1c</sub> increased. C) The frequency of Haplotype 2 “AGGC” in block 1 decreased when fasting plasma glucose increased. D) The frequency of rs2802292\*G decreased when HOMA-IR increased.

doi:10.1371/journal.pone.0126696.g002

who are used to moderate physical activity possess lower fasting plasma glucose and better insulin sensitivity. Evidence in animal models also indicated that FOXO3 phosphorylation plays crucial role in the metabolism improvement induced by exercise [29, 30]. In older subjects, there might be a “beneficial cycle” that subjects without chronic health conditions could do more moderate physical exercise to be healthier, that might partly be the reason for the interaction identified in long-lived individuals.

FOXO3 variants might acts in “modest effector model” in human and affect sub-clinical traits. As a housekeeping gene, FOXO3 is evolutionarily conserved [28], so a missense mutation might lead to severe phenotypes and premature death. Consistently, all the existing studies



only identified the noncoding variants in *FOXO3* [31]. This could partly account for why we failed to find the genetic contribution of *FOXO3* to T2DM, obesity and metabolic syndrome, possibly because of the minor effect of *FOXO3* variants which is insufficient for the threshold of a disease. It might play a role in multiple sub-clinical traits instead of furthering a disease itself. It would be worth running the same analysis in non-T2D cohorts to minimize bias.

*FOXO3* alleles have been associated with human longevity across ethnicities [10–14]. Interestingly, the genetic determinants identified in this study were largely those associated with human longevity (S5 Table). In theory, most of the aging-related intermediate traits and diseases derive from the gradual accumulation of genetic and environmental factors across the whole lifespan. This present study suggests a very good case for an inconsistent effect of genetic determinants on ageing-related mediated traits across different ages (Fig 3). Variants having more severe effects on homeostasis are likely to have resulted in earlier mortality, removing them/their effects from the long-lived cohort, and that this allows them to easier detect other variants having more modest effects. For hyperglycemia, the effect of modest variants in *FOXO3* might be concealed by other major variants (e.g., *PEPCK*, *PPARG* and *TCF7L2*) in most studies based on middle-aged subjects. However, it might be different when subject enter their eighties, or become even older, for the selection by death of major deleterious factors, whereas the long-lived individuals subjects could survive. Accordingly, it is unreasonable to apply the findings from middle-aged subjects to the long-lived individuals directly. Therefore, when long-lived individuals are investigated, the pattern of genetics should be re-considered, similar to the distinct pattern present in children.

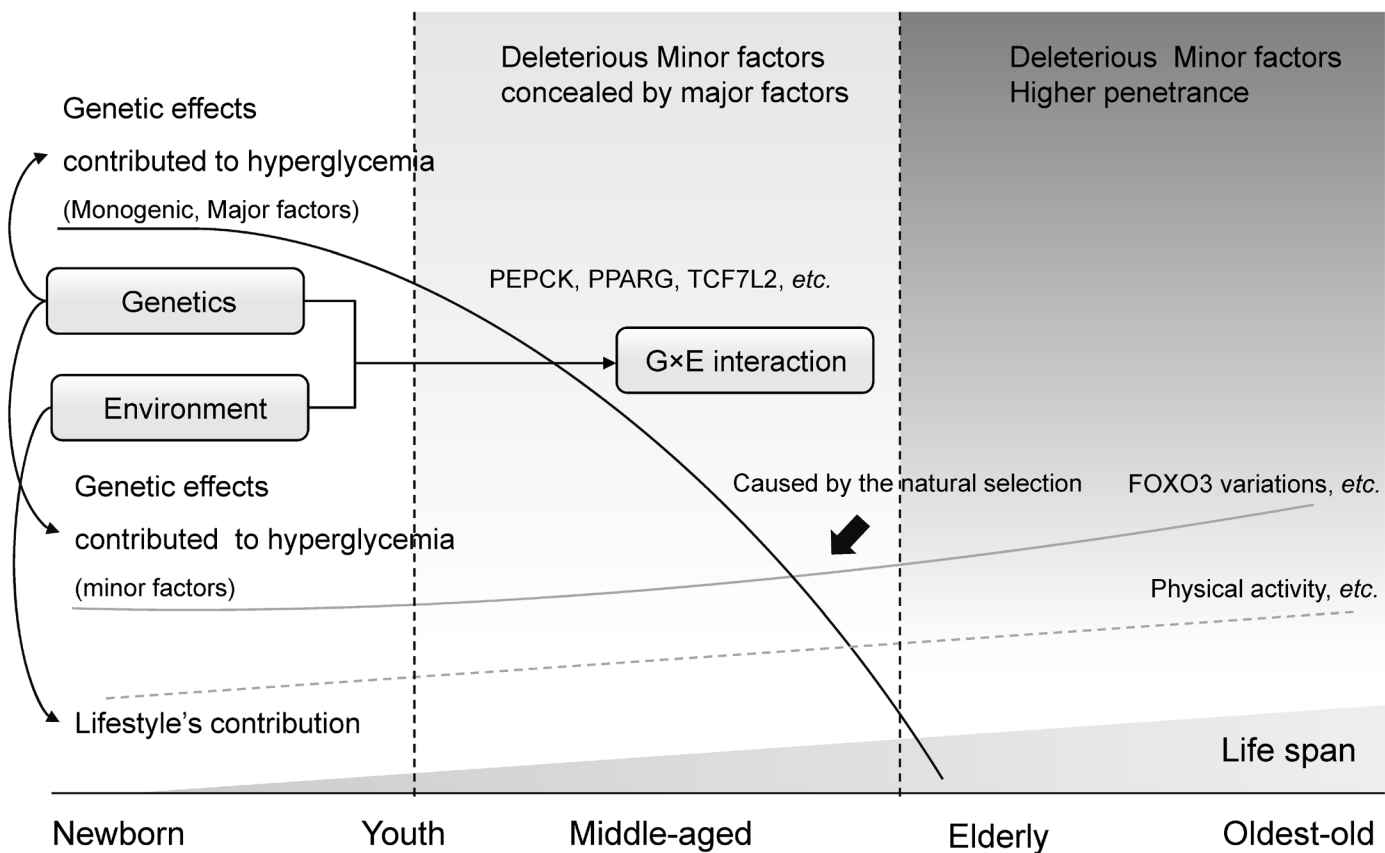

**Fig 3. Schematic of the potential hypothesis for an inconsistency in genetic and environmental determinants across human lifespan.** SNPs having more severe effects on glucose homeostasis are likely to have resulted in earlier mortality, removing them/their effects from the long-lived cohort, and that this allows them to easier detect other variants having more modest effects.

doi:10.1371/journal.pone.0126696.g003

The first strength of this study is the connection of shared alleles between lifespan and intermediate phenotypes in human, which effects differently in long-lived individuals and middle-aged subjects. Second, environmental factors (such as drinking, smoking, PA) were considered, including the potential interaction with *FOXO3* variants estimated using the nonparametric MDR method combined with multivariable-adjusted logistic regression. There are limitations in most retrospective association studies, including our current study. First, the insulin-related clinical parameters were incomplete. Because of the relative frail status of long-lived individuals with an increased risk of adverse events of hyperglycemic clamp and oral glucose tolerance test, only FPG, FINS, HOMA-IR and HbA<sub>1c</sub> were assessed. Second, the clinical relevance including the mortality, such as the Leiden 85-plus study, was not addressed comprehensively, which will be emphasized in our next global long-term follow-up work. Third, further next-generation sequencing-based exome scanning is needed to pinpoint the location of causal variant. However, this cross-sectional data would help direct the next follow-up visits.

In summary, our data provide a novel insight into the inconsistent genetic determinants between mid-life and long-lived individuals. The protective contribution of *FOXO3* and PA to fasting hyperglycemia only existed in our long-lived individuals, suggesting that *FOXO3* might be a shared genetic predisposition between hyperglycemia and lifespan.

## Supporting Information

**S1 Table. Primers for genotyping of *FOXO3* polymorphisms based on High-Resolution Melting Assay.** H\_calibrator: high temperature calibrator (3'-C3-blocked); L\_calibrator: low temperature calibrator (3'-C3-blocked); NA: not available.

(DOCX)

**S2 Table. Variants in *FOXO3* captured by the tSNP design based on the HapMap database.** Seven tSNP covering the 120.9kb on chromosome 6 by HapMap online tools based on the CHB population (Han Chinese residents in Beijing) data. \* criteria for inclusion: (1) minor allele frequency (MAF) >0.05; (2) r<sup>2</sup> threshold of 0.8 and a log of odds (LOD) threshold for multi-marker testing of 3.0; (3) a minimum distance between tags of 100 bp; (4) SNPs for which an association with longevity has been reported were forced included; (5) both of pairwise tagging and aggressive multi-marker tagging (use 2-marker haplotypes) strategies were conducted to increase the efficiency of tagging.

(DOCX)

**S3 Table. The association of fasting hyperglycemia-protective alleles/ haplotype in *FOXO3* with longevity.** Comparisons between LLI and MI\_S group, the OR for rs2802288 (G/A), rs2802290 (A/G) and rs2802292 (T/G) were all based on allele-contrast model.

(DOCX)

**S4 Table. Relationship between effect alleles in *FOXO3* and lipids, T2DM, Obesity and CVD status.** TC: total cholesterol; TG: triglyceride; T2DM: type 2 diabetes; CVD: cardiovascular disease; NA: not available for missing data. <sup>a</sup> for continuous variables (TC, TG), divided by lowest, middle and highest tertile and calculated by trend chi-square test; for categorical variables (T2DM, Obesity and CVD), calculated by case-control chi-square test. <sup>b</sup> according to whether BMI  $\geq 28$  kg/m<sup>2</sup>. <sup>c</sup> self-reported CVD status.

(DOCX)

**S5 Table. Publications about the included tSNPs in *FOXO3*.** NA: not available.

(DOCX)

## Acknowledgments

We thank Ms. Lin Zhou in Beijing Youth Science and Technology Club for assisting with the epidemiological visiting. We thank all the staffs in People's government of Yongfu County for their efforts in organizing and coordination.

## Author Contributions

Conceived and designed the experiments: LS ZH ZY. Performed the experiments: LS YQ JH. Analyzed the data: LS CH ZY. Contributed reagents/materials/analysis tools: LS CZ QL ZL KQ QZ. Wrote the paper: LS CZ QL ZL KQ QZ.

## References

1. Schmidt MI, Hadji-Georgopoulos A, Rendell M, Margolis S, Kowarski A. The dawn phenomenon, an early morning glucose rise: implications for diabetic intraday blood glucose variation. *Diabetes care*. 1981; 4(6):579–85. Epub 1981/11/01. PMID: [6751733](#).
2. Sheehan JP. Fasting hyperglycemia: etiology, diagnosis, and treatment. *Diabetes technology & therapeutics*. 2004; 6(4):525–33. Epub 2004/08/24. doi: [10.1089/1520915041705910](#) PMID: [15321011](#).
3. Rodriguez BL, Curb JD, Burchfiel CM, Huang B, Sharp DS, Lu GY, et al. Impaired glucose tolerance, diabetes, and cardiovascular disease risk factor profiles in the elderly. The Honolulu Heart Program. *Diabetes care*. 1996; 19(6):587–90. Epub 1996/06/01. PMID: [8725856](#).
4. National Center for Chronic Disease Prevention and Health Promotion C. Chronic disease notes and reports: special focus. *Healthy Aging*. 1999; 12(3).
5. Muggeo M, Zoppini G, Bonora E, Brun E, Bonadonna RC, Moghetti P, et al. Fasting plasma glucose variability predicts 10-year survival of type 2 diabetic patients: the Verona Diabetes Study. *Diabetes care*. 2000; 23(1):45–50. Epub 2000/06/17. PMID: [10857967](#).
6. Graff M, Ngwa JS, Workalemahu T, Homuth G, Schipf S, Teumer A, et al. Genome-wide analysis of BMI in adolescents and young adults reveals additional insight into the effects of genetic loci over the life course. *Human molecular genetics*. 2013; 22(17):3597–607. Epub 2013/05/15. doi: [10.1093/hmg/ddt205](#) PMID: [23669352](#); PubMed Central PMCID: PMC3736869.
7. Inzucchi SE, Bergenstal RM, Buse JB, Diamant M, Ferrannini E, Nauck M, et al. Management of hyperglycemia in type 2 diabetes: a patient-centered approach: position statement of the American Diabetes Association (ADA) and the European Association for the Study of Diabetes (EASD). *Diabetes care*. 2012; 35(6):1364–79. Epub 2012/04/21. doi: [10.2337/dc12-0413](#) PMID: [22517736](#); PubMed Central PMCID: PMC3357214.
8. Ponugoti B, Dong G, Graves DT. Role of forkhead transcription factors in diabetes-induced oxidative stress. *Experimental diabetes research*. 2012; 2012:939751. Epub 2012/03/29. doi: [10.1155/2012/939751](#) PMID: [22454632](#); PubMed Central PMCID: PMC3290826.
9. Tissenbaum HA, Ruvkun G. An insulin-like signaling pathway affects both longevity and reproduction in *Caenorhabditis elegans*. *Genetics*. 1998; 148(2):703–17. Epub 1998/03/20. PMID: [9504918](#); PubMed Central PMCID: PMC1459840.
10. Willcox BJ, Donlon TA, He Q, Chen R, Grove JS, Yano K, et al. FOXO3A genotype is strongly associated with human longevity. *Proceedings of the National Academy of Sciences of the United States of America*. 2008; 105(37):13987–92. Epub 2008/09/04. doi: [10.1073/pnas.0801030105](#) PMID: [18765803](#); PubMed Central PMCID: PMC2544566.
11. Flachsbart F, Caliebe A, Kleindorp R, Blanche H, von Eller-Eberstein H, Nikolaus S, et al. Association of FOXO3A variation with human longevity confirmed in German centenarians. *Proceedings of the National Academy of Sciences of the United States of America*. 2009; 106(8):2700–5. Epub 2009/02/07. doi: [10.1073/pnas.0809594106](#) PMID: [19196970](#); PubMed Central PMCID: PMC2650329.
12. Anselmi CV, Malovini A, Roncarati R, Novelli V, Villa F, Condorelli G, et al. Association of the FOXO3A locus with extreme longevity in a southern Italian centenarian study. *Rejuvenation research*. 2009; 12(2):95–104. Epub 2009/05/07. doi: [10.1089/rej.2008.0827](#) PMID: [19415983](#).
13. Li Y, Wang WJ, Cao H, Lu J, Wu C, Hu FY, et al. Genetic association of FOXO1A and FOXO3A with longevity trait in Han Chinese populations. *Human molecular genetics*. 2009; 18(24):4897–904. Epub 2009/10/02. doi: [10.1093/hmg/ddp459](#) PMID: [19793722](#); PubMed Central PMCID: PMC2790334.
14. Pawlikowska L, Hu D, Huntsman S, Sung A, Chu C, Chen J, et al. Association of common genetic variation in the insulin/IGF1 signaling pathway with human longevity. *Aging cell*. 2009; 8(4):460–72. Epub

- 2009/06/06. doi: [10.1111/j.1474-9726.2009.00493.x](https://doi.org/10.1111/j.1474-9726.2009.00493.x) PMID: [19489743](https://pubmed.ncbi.nlm.nih.gov/19489743/); PubMed Central PMCID: PMC3652804.
15. Onuma H, Vander Kooi BT, Boustead JN, Oeser JK, O'Brien RM. Correlation between FOXO1a (FKHR) and FOXO3a (FKHRL1) binding and the inhibition of basal glucose-6-phosphatase catalytic subunit gene transcription by insulin. *Mol Endocrinol.* 2006; 20(11):2831–47. Epub 2006/07/15. doi: [10.1210/me.2006-0085](https://doi.org/10.1210/me.2006-0085) PMID: [16840535](https://pubmed.ncbi.nlm.nih.gov/16840535/).
  16. Nair AK, Sugunan D, Kumar H, Anilkumar G. Association analysis of common variants in FOXO3 with type 2 diabetes in a South Indian Dravidian population. *Gene.* 2012; 491(2):182–6. Epub 2011/10/22. doi: [10.1016/j.gene.2011.09.032](https://doi.org/10.1016/j.gene.2011.09.032) PMID: [22015955](https://pubmed.ncbi.nlm.nih.gov/22015955/).
  17. Soerensen M, Dato S, Tan Q, Thinggaard M, Kleindorp R, Beekman M, et al. Evidence from case-control and longitudinal studies supports associations of genetic variation in APOE, CETP, and IL6 with human longevity. *Age (Dordr).* 2013; 35(2):487–500. Epub 2012/01/12. doi: [10.1007/s11357-011-9373-7](https://doi.org/10.1007/s11357-011-9373-7) PMID: [22234866](https://pubmed.ncbi.nlm.nih.gov/22234866/); PubMed Central PMCID: PMC3592963.
  18. Lissner L, Bengtsson C, Bjorkelund C, Wedel H. Physical activity levels and changes in relation to longevity. A prospective study of Swedish women. *American journal of epidemiology.* 1996; 143(1):54–62. Epub 1996/01/01. PMID: [8533747](https://pubmed.ncbi.nlm.nih.gov/8533747/).
  19. Barbagallo CM, Avena MR, Frada G, Chessari S, Mangiacavallo G, Notarbartolo A. Plasma lipid, apolipoprotein and Lp(a) levels in elderly normolipidemic women: relationships with coronary heart disease and longevity. *Gerontology.* 1995; 41(5):260–6. Epub 1995/01/01. PMID: [8537009](https://pubmed.ncbi.nlm.nih.gov/8537009/).
  20. Sun L, Hu CY, Shi XH, Zheng CG, Huang ZZ, Lv ZP, et al. Trans-ethnic shift of the risk genotype in the CETP I405V with longevity: a Chinese case-control study and meta-analysis. *PLoS one.* 2013; 8(8): e72537. Epub 2013/08/27. doi: [10.1371/journal.pone.0072537](https://doi.org/10.1371/journal.pone.0072537) PMID: [23977315](https://pubmed.ncbi.nlm.nih.gov/23977315/); PubMed Central PMCID: PMC3744487.
  21. Li H, Gan W, Lu L, Dong X, Han X, Hu C, et al. A genome-wide association study identifies GRK5 and RASGRP1 as type 2 diabetes loci in Chinese Hans. *Diabetes.* 2013; 62(1):291–8. Epub 2012/09/11. doi: [10.2337/db12-0454](https://doi.org/10.2337/db12-0454) PMID: [22961080](https://pubmed.ncbi.nlm.nih.gov/22961080/); PubMed Central PMCID: PMC3526061.
  22. Alberti KG, Zimmet PZ. Definition, diagnosis and classification of diabetes mellitus and its complications. Part 1: diagnosis and classification of diabetes mellitus provisional report of a WHO consultation. *Diabetic medicine: a journal of the British Diabetic Association.* 1998; 15(7):539–53. Epub 1998/08/01. doi: [10.1002/\(SICI\)1096-9136\(199807\)15:7<539::AID-DIA668>3.0.CO;2-S](https://doi.org/10.1002/(SICI)1096-9136(199807)15:7<539::AID-DIA668>3.0.CO;2-S) PMID: [9686693](https://pubmed.ncbi.nlm.nih.gov/9686693/).
  23. Sun L, Yang Z, Jin F, Zhu XQ, Qu YC, Shi XH, et al. The Gly482Ser variant of the PPARGC1 gene is associated with Type 2 diabetes mellitus in northern Chinese, especially men. *Diabetic medicine: a journal of the British Diabetic Association.* 2006; 23(10):1085–92. Epub 2006/09/19. doi: [10.1111/j.1464-5491.2006.01949.x](https://doi.org/10.1111/j.1464-5491.2006.01949.x) PMID: [16978372](https://pubmed.ncbi.nlm.nih.gov/16978372/).
  24. Sun L, Hu C, Zheng C, Huang Z, Lv Z, Huang J, et al. Gene-gene interaction between CETP and APOE polymorphisms confers higher risk for hypertriglyceridemia in oldest-old Chinese women. *Experimental gerontology.* 2014; 55:129–33. Epub 2014/04/22. doi: [10.1016/j.exger.2014.04.003](https://doi.org/10.1016/j.exger.2014.04.003) PMID: [24746514](https://pubmed.ncbi.nlm.nih.gov/24746514/).
  25. Matthews DR, Hosker JP, Rudenski AS, Naylor BA, Treacher DF, Turner RC. Homeostasis model assessment: insulin resistance and beta-cell function from fasting plasma glucose and insulin concentrations in man. *Diabetologia.* 1985; 28(7):412–9. Epub 1985/07/01. PMID: [3899825](https://pubmed.ncbi.nlm.nih.gov/3899825/).
  26. Wittwer CT, Reed GH, Gundry CN, Vandersteen JG, Pryor RJ. High-resolution genotyping by amplicon melting analysis using LCGreen. *Clinical chemistry.* 2003; 49(6 Pt 1):853–60. Epub 2003/05/27. PMID: [12765979](https://pubmed.ncbi.nlm.nih.gov/12765979/).
  27. Dupont WD, Plummer WD Jr. Power and sample size calculations for studies involving linear regression. *Controlled clinical trials.* 1998; 19(6):589–601. Epub 1999/01/06. PMID: [9875838](https://pubmed.ncbi.nlm.nih.gov/9875838/).
  28. Banasik K, Ribel-Madsen R, Gjesing AP, Wegner L, Andersson A, Poulsen P, et al. The FOXO3A rs2802292 G-allele associates with improved peripheral and hepatic insulin sensitivity and increased skeletal muscle-FOXO3A mRNA expression in twins. *The Journal of clinical endocrinology and metabolism.* 2011; 96(1):E119–24. Epub 2010/10/01. doi: [10.1210/jc.2010-0881](https://doi.org/10.1210/jc.2010-0881) PMID: [20881262](https://pubmed.ncbi.nlm.nih.gov/20881262/).
  29. Sanchez AM. FoxO transcription factors and endurance training: a role for FoxO1 and FoxO3 in exercise-induced angiogenesis. *The Journal of physiology.* 2015; 593(2):363–4. Epub 2015/01/30. doi: [10.1113/jphysiol.2014.285999](https://doi.org/10.1113/jphysiol.2014.285999) PMID: [25630258](https://pubmed.ncbi.nlm.nih.gov/25630258/); PubMed Central PMCID: PMC4303382.
  30. Lin CH, Lin CC, Ting WJ, Pai PY, Kuo CH, Ho TJ, et al. Resveratrol enhanced FOXO3 phosphorylation via synergetic activation of SIRT1 and PI3K/Akt signaling to improve the effects of exercise in elderly rat hearts. *Age (Dordr).* 2014; 36(5):9705. Epub 2014/08/28. doi: [10.1007/s11357-014-9705-5](https://doi.org/10.1007/s11357-014-9705-5) PMID: [25158994](https://pubmed.ncbi.nlm.nih.gov/25158994/).
  31. Donlon TA, Curb JD, He Q, Grove JS, Masaki KH, Rodriguez B, et al. FOXO3 gene variants and human aging: coding variants may not be key players. *The journals of gerontology Series A, Biological sciences and medical sciences.* 2012; 67(11):1132–9. Epub 2012/03/31. doi: [10.1093/gerona/gls067](https://doi.org/10.1093/gerona/gls067) PMID: [22459618](https://pubmed.ncbi.nlm.nih.gov/22459618/); PubMed Central PMCID: PMC3668389.
